# Supplementary material
Source: publisher figshare collection journal article supplement (https://diabetesjournals.figshare.com/articles/dataset/_/19184456)
Supplement: Supplementary file 1 [file 1]

**Supplementary Figure 1.** (A) Aligned protein sequences of human and mouse GAD65 and GAD67. Light to dark shades, low to high similarity. Star, residue identical in all 4 sequences. Dot, residue identical in 2 out of 4 sequences. Black rectangle, GAD65<sub>115-127</sub> epitope. (B) Numbers of tetWT<sup>+</sup> and tet120E<sup>+</sup> CD4<sup>+</sup> T cells detected from pooled secondary lymphoid organs (SLOs, pooled from spleen, ancillary lymph nodes, brachial lymph nodes, cervical lymph nodes, inguinal lymph nodes, popliteal lymph nodes) of 10-12wk (n=6) and 18-20wk old (n=5) untreated DR4Tg females. (C-G) Cells from spleens and inguinal lymph nodes of p115.WT/CFA and p115.120E/CFA immunized DR4Tg mice were harvested 12 days after immunization and cultured *ex vivo* for 2 weeks with APCs, 20U/ml hIL-2 and 10 $\mu$ M of p115.WT or p115.120E (the same peptide as immunization). (C) After 2 weeks, *ex vivo* expanded polyclonal T cells were stimulated for 5hrs with indicated peptides and Flt3l induced DCs in the presence of Brefeldin A and monensin. Intracellular IFN $\gamma$  was measured as the readout of activation. Representative flow plots of T cells stimulated with 1 $\mu$ M of indicated peptides are shown. Gated on Foxp3<sup>-</sup> CD4<sup>+</sup> T cells. (D-G) *Ex vivo* expanded polyclonal CD4<sup>+</sup> T cells were stained with tetWT, tet120E or CLIP tetramer conjugated with APC or PE. For cells co-stained with tetWT and tet120E, two fluorophore combination conditions (tetWT-PE&tet120E-APC, tetWT-APC&tet120E-PE) were included to eliminate fluorophore caused bias. (D, E) Representative flow plots and (F, G) summary of frequencies of tetramer<sup>+</sup> cells in CD4<sup>+</sup> T cells. Data are plotted as means  $\pm$  SEM and are pooled from (B, F, G) 2 or (C) 3 independent experiments. \*\*,  $p \leq 0.01$ ; \*,  $p \leq 0.05$ ; ns > 0.05 by (B) two-way ANOVA or (F, G) one-way ANOVA followed by Benjamini, Krieger and Yekutieli's test.

**Supplementary Figure 2.** (A, B) HEK293Ts were co-transfected with (A) WT-TCR or (B) 120E-TCR TCR and CD3 $\epsilon$  expression plasmids and stained with PE conjugated tetWT, tet120E or control CLIP tetramer. Cells were also stained for surface CD3 expression. (C) Surface CD3 expression of WT-TCR or 120E-TCR TCR transduced 4G4 thymoma cells after CD3<sup>+</sup> MACS enrichment. WT-TCR expressing cell line without CD3 staining (WT-TCR NS) was used as negative control. Representative plots of 3 independent experiments.

**Supplementary Figure 3.** (A, B)  $1.2 \times 10^7$  Flt3l induced DCs generated in DR4Tg.RagKO mice were labeled with CFSE and transferred intravenously to DR4Tg mice. Thymi of recipient mice were harvested 3 days after the transfer. (A) Representative flow plots of CFSE<sup>+</sup> donor cells in transferred and non-transferred (NA) thymi.

Gated on Zombie red-CD3-CD11c<sup>+</sup> cells. **(B)** Numbers of CFSE<sup>+</sup>CD11c<sup>+</sup>HLA-DR<sup>+</sup> donor DCs. **(C-H)** Indicated peptide pulsed DCs were transferred **(IV)** into WT-TCR and 120E-TCR Hu-Rg mice. Hu-Rg mice received two DC transfers (7 days apart) and were sacrificed one week after the second transfer (6-8 weeks after BM transfer). Data were pooled from 3 independent experiments (n=7-10). **(C)** Frequencies and **(D)** numbers of Ametrine<sup>+</sup> cells within Lin-Sca-1<sup>+</sup> hematopoietic precursors of single TCR Hu-Rg mice that received HA pulsed DC transfer. **(E)** Representative flow plots of Ametrine<sup>+</sup> thymocytes. **(F)** Frequencies and numbers of immature Ametrine<sup>+</sup>MHCI<sup>lo/-</sup> thymocytes of WT-TCR and 120E-TCR Hu-Rg mice. **(G)** Representative flow plots of activated caspase 3 expression in CD4 SP thymocytes of WT-TCR and 120E-TCR Hu-Rg mice. **(H)** Representative flow plots of thymic Tregs in WT-TCR and 120E-TCR Hu-Rg mice. Gated on Ametrine<sup>+</sup>CD73-CD4 SP. Data are plotted as mean  $\pm$  SEM. \*\*,  $p \leq 0.01$ ; \*,  $p \leq 0.05$ ; ns  $> 0.05$  by (B-D) Mann-Whitney test and (F) two-way ANOVA and Benjamini, Krieger and Yekutieli's test.

**Supplementary Figure 4.** **(A-D)** WT-TCR and 120E-TCR expressing Hu-Rg mice were sacrificed for analysis 8 weeks after bone marrow transfer. **(A, B)** Frequencies of Foxp3<sup>+</sup> Tregs in CD4<sup>+</sup> T cells in spleens of Hu-Rg mice expressing indicated TCRs. **(C-E)** CD4<sup>+</sup> T cells in spleens, ndLNs, pLNs and pancreatic islets (Gated on CD4<sup>+</sup>CD5<sup>+</sup>CD3<sup>+</sup>Ametrine<sup>+</sup>). **(F-I)** Hu-Rg mice received two peptide pulsed DC transfers (7 days apart) and were sacrificed one week after the second transfer (6-8 weeks after bone marrow transfer). Numbers of splenic CD4<sup>+</sup> T cells (Ametrine<sup>+</sup>CD4<sup>+</sup>CD3<sup>+</sup>CD5<sup>+</sup>) in **(F)** WT-TCR and **(G)** 120E-TCR Hu-Rg mice that received DCs pulsed with indicated peptide. **(H, I)** Frequencies of Foxp3<sup>+</sup> Tregs among splenic CD4<sup>+</sup> T cells. Data are plotted as means  $\pm$  SEM and are pooled from 2 or 3 independent experiments (n=6-10). \*\*,  $p \leq 0.01$ ; \*,  $p \leq 0.05$ ; ns,  $p > 0.05$  by Mann-Whitney test (B) and Kruskal-Wallis ANOVA (F, G) or Welch ANOVA (H, I). Outliers were excluded from analysis using ROUT test.

**Supplementary Figure 5.** CD4<sup>+</sup> T cells were isolated from spleens of Hu-Rg mice, stimulated with PMA and ionomycin and expanded in vitro for 2 weeks with 1000U/mL hIL-2. Expanded cells were then stimulated with antiCD3 or APC and 10 $\mu$ M indicated peptide for 5 hours in the presence of BFA and monensin. **(A)** Representative flow plots and **(B, C)** summary of Intracellular interferon gamma production. Data are plotted as

means  $\pm$  SEM pooled from 3 independent experiments (n=5-11). \*\*,  $p \leq 0.01$ ; \*,  $p \leq 0.05$ ; ns  $> 0.05$  by

Welch ANOVA followed by Dunnett's test.
