# Supplementary material
Source: publisher figshare collection journal article supplement (https://diabetesjournals.figshare.com/articles/dataset/_/19184456)

**A**

WT-TCR

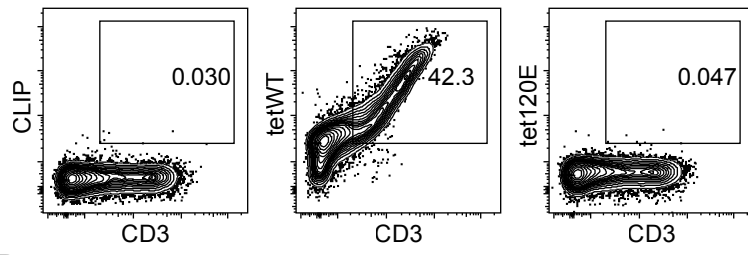**B**

120E-TCR

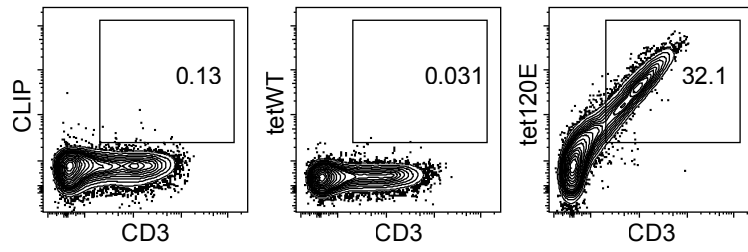**C**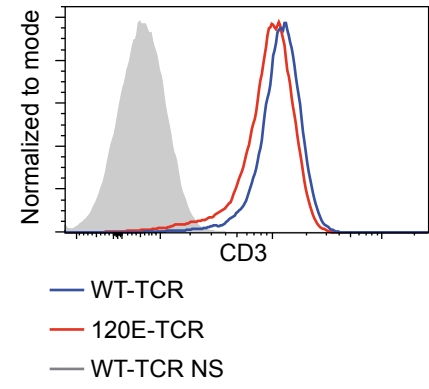

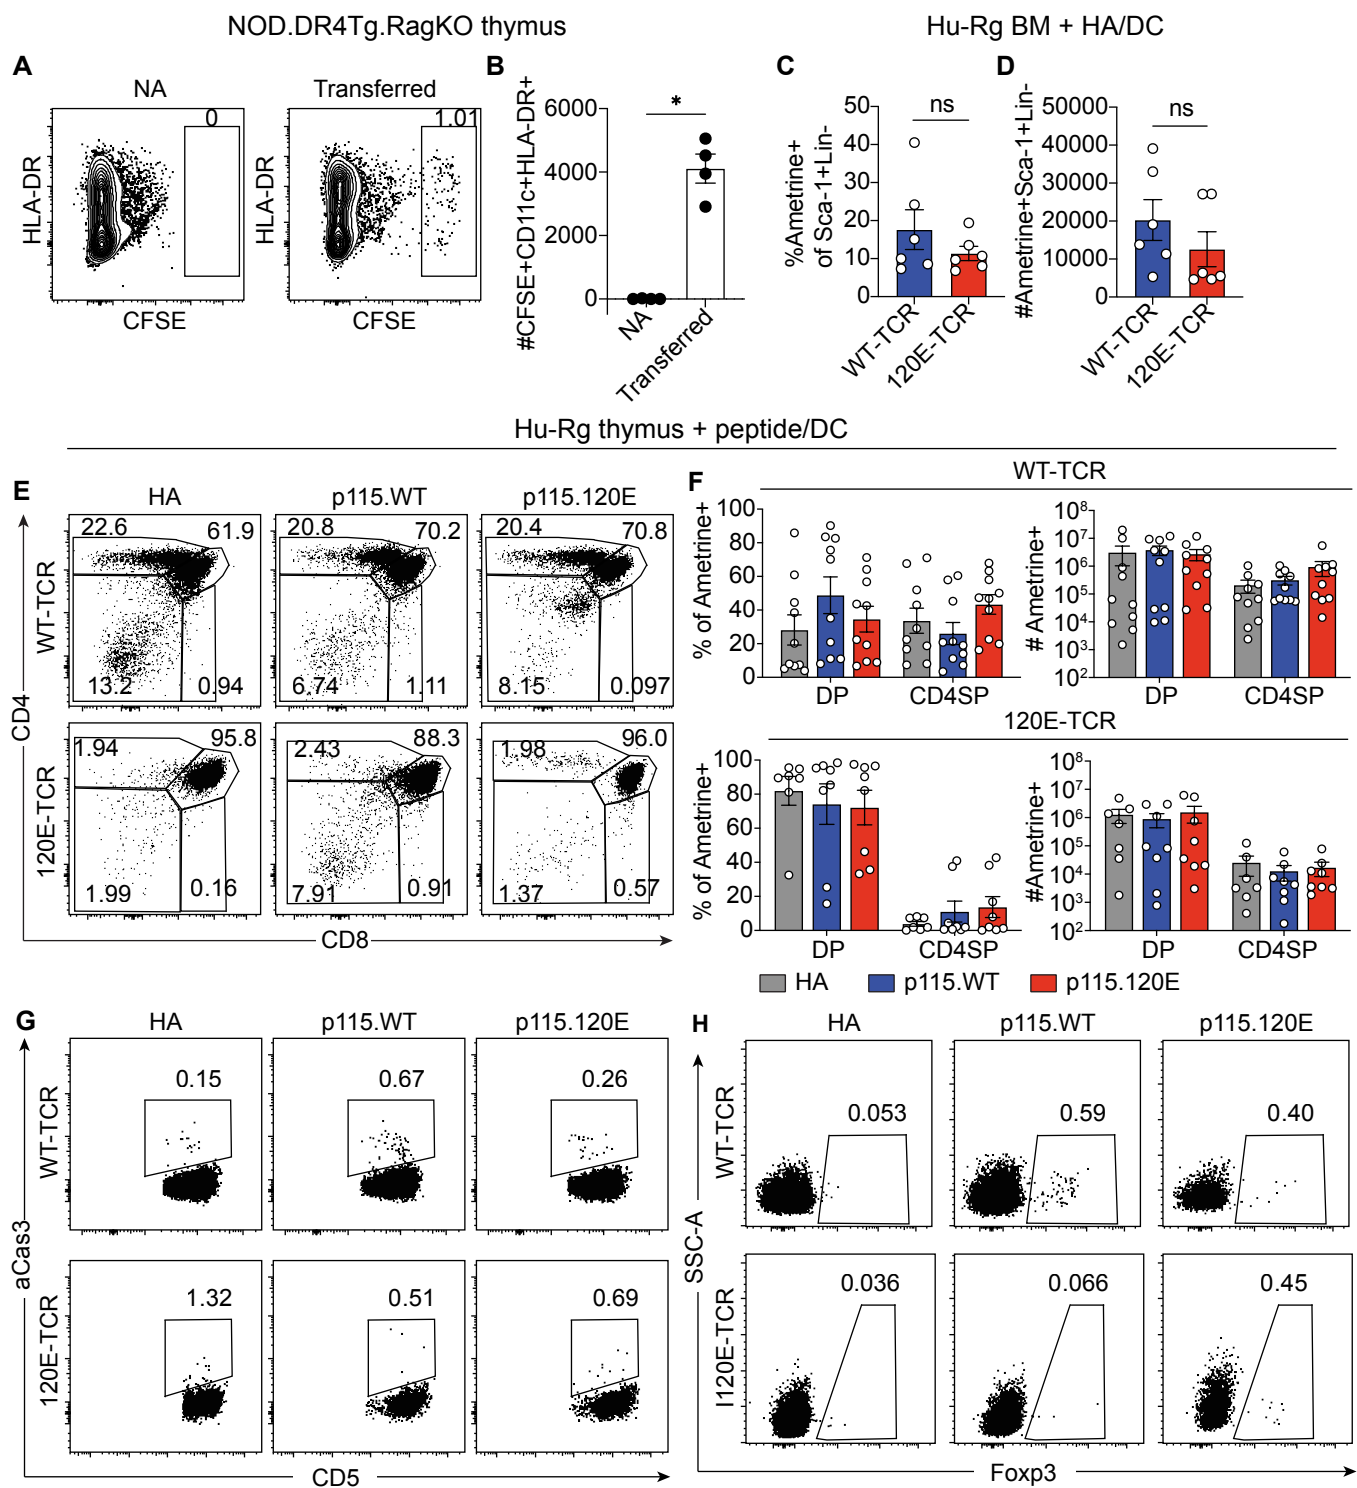

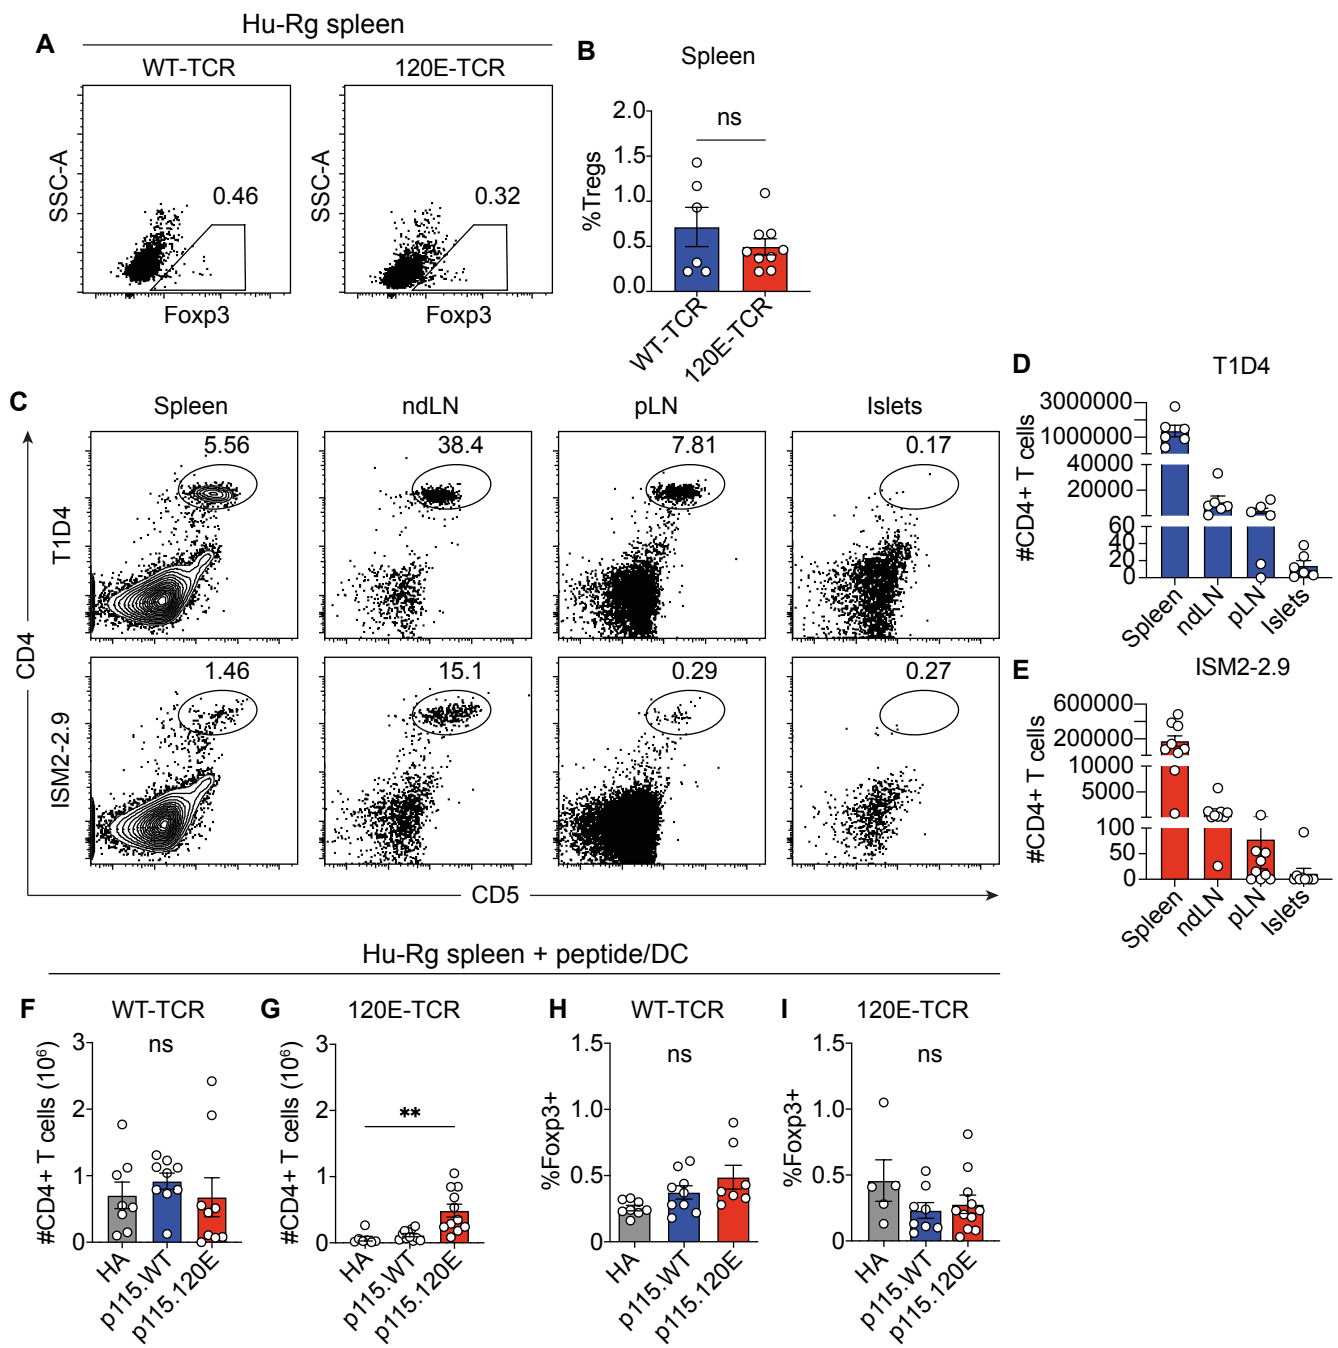

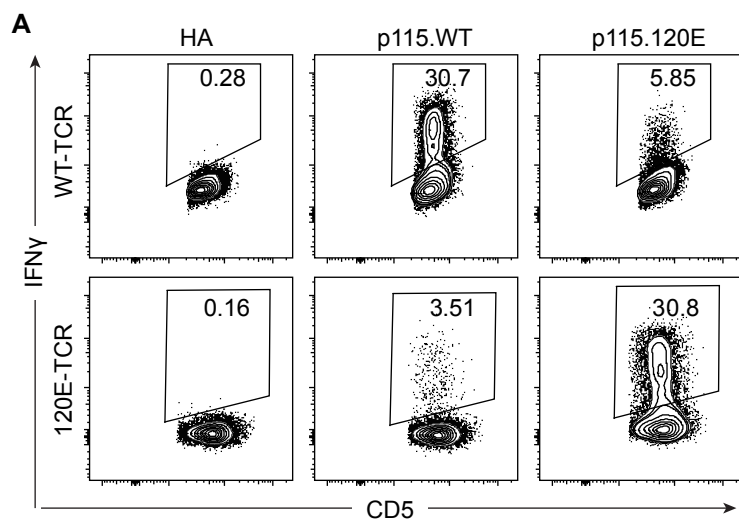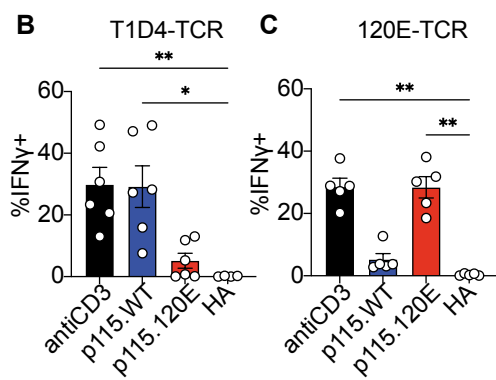

Supplement: Supplementary file 2 [file 1]
